# Supplementary material for: Endophilin A2 deficiency protects rodents from autoimmune arthritis by modulating T cell activation
Source: PubMed Central journal article supplement (PMC7840939; doi:10.1038/s41467-020-20586-2), 2021-01-27
Supplement: 41467_2020_20586_MOESM1_ESM.pdf [file 41467_2020_20586_MOESM1_ESM.pdf]

Supplementary information for

**Endophilin A2 deficiency protects rodents from autoimmune arthritis by modulating T cell activation**

**Authors:**

Ulrika Norin<sup>\*1</sup>, Carola Rintisch<sup>2,1</sup>, Liesu Meng<sup>1,3</sup>, Florian Forster<sup>1</sup>, Diana Ekman<sup>4</sup>, Jonatan Tuncel<sup>1</sup>, Katrin Klocke<sup>1</sup>, Johan Bäcklund<sup>1</sup>, Min Yang<sup>1</sup>, Michael Y. Bonner<sup>1</sup>, Gonzalo Fernandez Lahore<sup>1</sup>, Klementy Shchetynsky<sup>5</sup>, Maria Bergquist<sup>6</sup>, Inger Gjertsson<sup>6</sup>, Norbert Hubner<sup>2,7</sup>, Liselotte Bäckdahl<sup>1</sup>, Rikard Holmdahl<sup>\*1,3</sup>

\* Corresponding authors

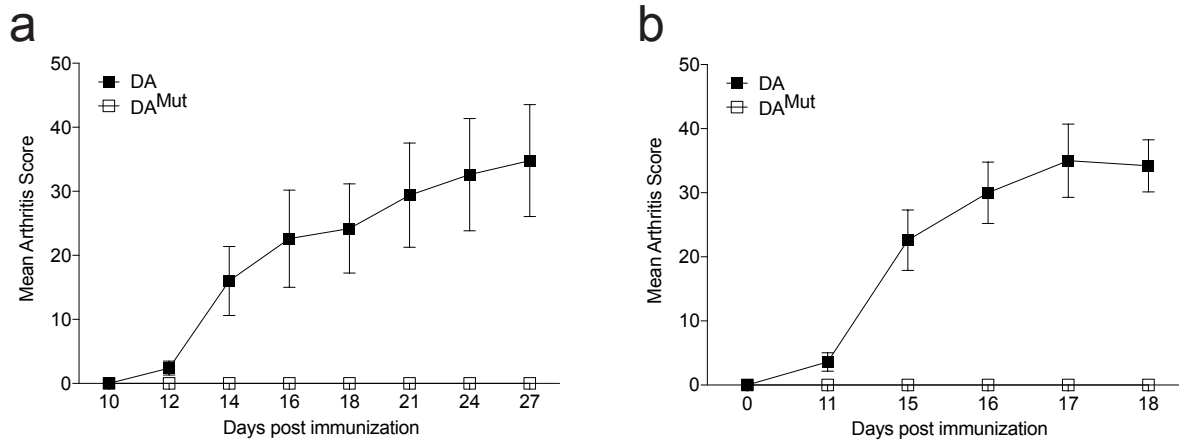

**Supplementary figure 1. Arthritis resistance in DA<sup>Mut</sup> rat is not due to environmental factors.** a) Mean arthritis score in 5 DA and 7 DA<sup>Mut</sup> rats after pristane immunization in conventional animal facility. b) Mean arthritis score in 5 DA and 4 DA<sup>Mut</sup> rats after pristane immunization in SPF (FELASA II) animal facility. Data are presented as mean with error bars indicating  $\pm$ SEM with each dot representing an individual value.

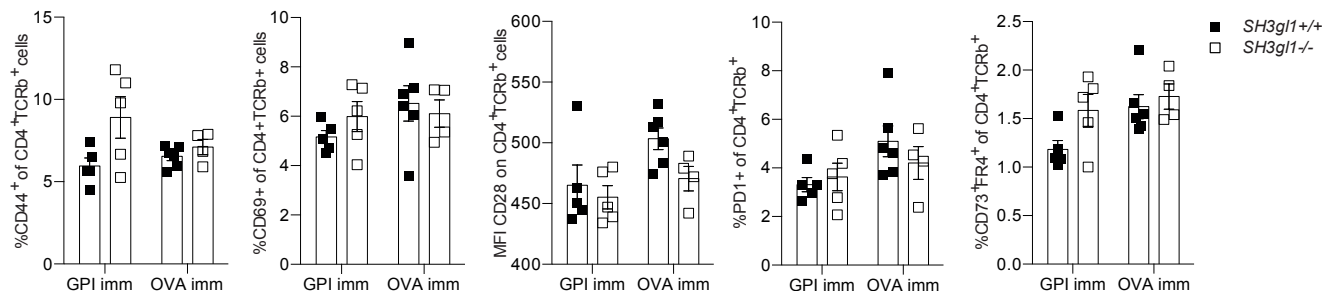

**Supplementary figure 2. No difference in activated and anergic T cells after GPI-protein and ovalbumin immunization.** Frequency and mean fluorescence intensity of activation and energy markers in CD4<sup>+</sup>T cells from draining lymph nodes ten days after immunization with GPI protein (5 *SH3gl1* deficient mice and 4 wild type littermates) and ovalbumin (4 *SH3gl1* deficient mice and 6 wild type littermates). Data are presented as mean with error bars indicating  $\pm$ SEM with each dot representing an individual value.

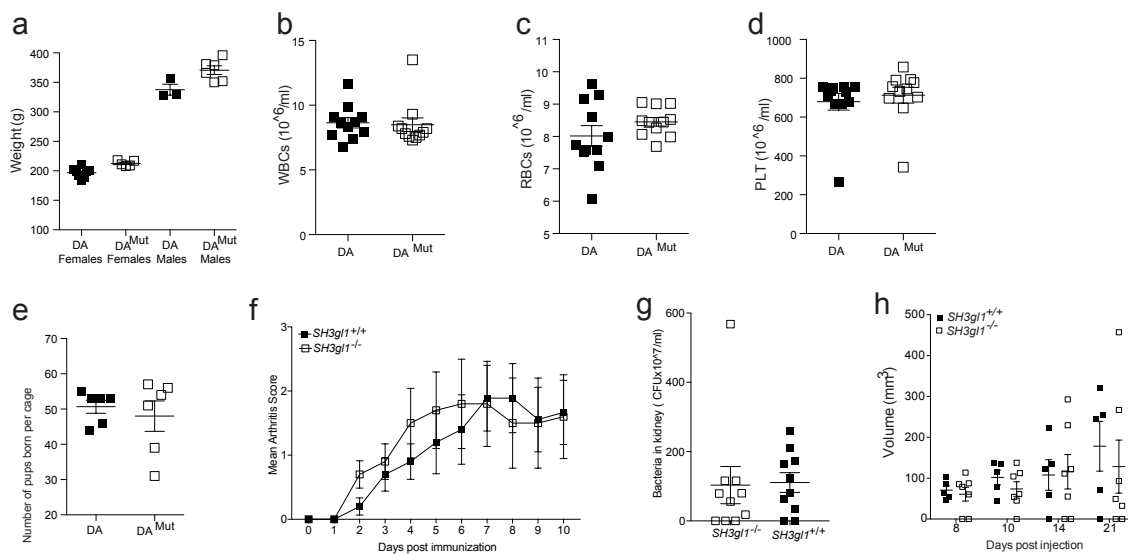

**Supplementary figure 3. EA2 deficiency does not affect the general health of rodents or leads to increased susceptibility to a bacterial infection nor excessive tumor growth.** a) Weight of DA and DA<sup>Mut</sup> rats at 1.5 years of age b) Number of white blood cells (WBCs) in heparinized blood of 11 DA and 11 DA<sup>Mut</sup> rats at 1.5 years of age c) Number of red blood cells (RBCs) in heparinized blood of DA and DA<sup>Mut</sup> rats at 1.5 years of age d) Number of platelets in heparinized blood of DA and DA<sup>Mut</sup> rats at 1.5 years of age e) Number of pups born from 6 individual DA and DA<sup>Mut</sup> breeding pairs during a period of approximately one year. f) Mean arthritis score after induction of septic arthritis using *Staphylococcus aureus* LS-1 in 10 *Sh3gl1* deficient and 10 wildtype littermate mice. g) Colony-forming units in kidneys ten days after *Staphylococcus aureus* LS-1 infection. h) Tumor growth in 7 *SH3gl1* deficient mice and 5 wild type littermates after injection of melanoma cells. Data are presented as mean with error bars indicating  $\pm$ SEM with each dot representing an individual value.

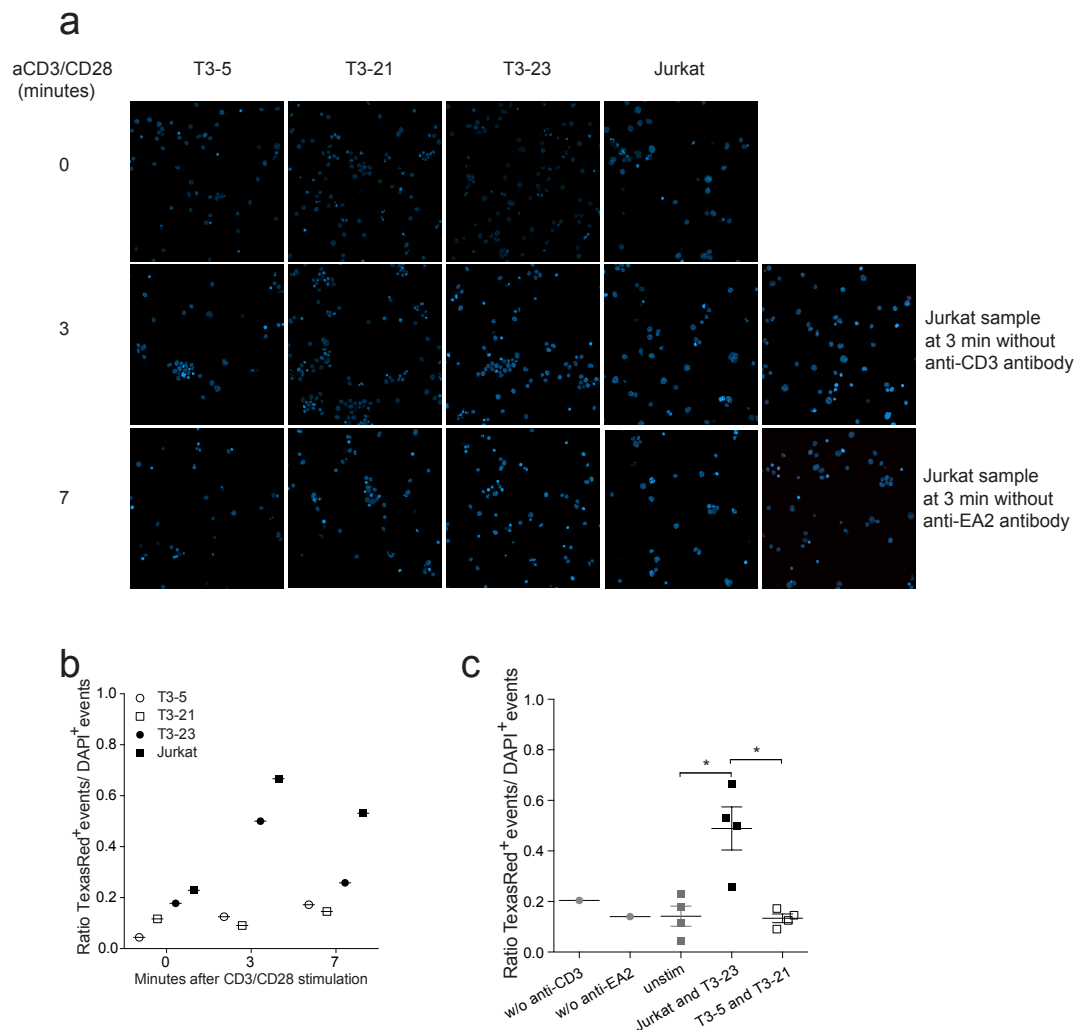

**Supplementary figure 4. Co-localization of EA2 and the TCR in Jurkat and EA2 CRISPR knock-out cells.** a) Detection of EA2 and TCR co-localization in unstimulated and anti-CD3/CD28 stimulated cells with proximity-ligase assay. b) Quantification of number of interactions determined as the ratio of TexasRed positive cells and DAPI positive cells in Jurkat and EA2 knock-out cells. c) Pooled ratio of TexasRed positive cells and DAPI positive cells from the three and seven-minute time points in *SH3gl1* sufficient and *SH3gl1* deficient cells compared to the unstimulated samples. Non-parametrical Mann-Whitney *U* test was used for statistical evaluation of data. Data are presented as mean with error bars indicating  $\pm$ SEM with each dot representing an individual value.

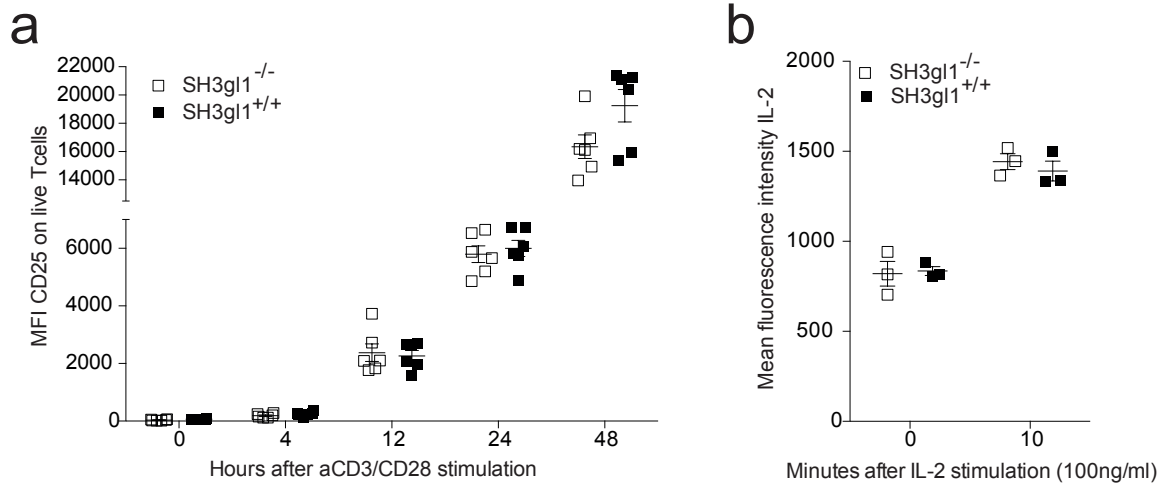

**Supplementary figure 5. EA2 does not regulate activation induced CD25 expression nor IL-2 internalization.** a) Expression of the IL-2 receptor CD25 after anti-CD3/CD28 stimulation in T cells from 6 *SH3gl1*<sup>-/-</sup> and 6 *SH3gl1*<sup>+/+</sup> mice. b) Expression of intracellular IL-2 in T cells before and 10 minutes after IL-2 stimulation in 3 *SH3gl1*<sup>-/-</sup> and 3 *SH3gl1*<sup>+/+</sup> mice. Data are presented as mean with error bars indicating  $\pm$ SEM with each dot representing an individual value.

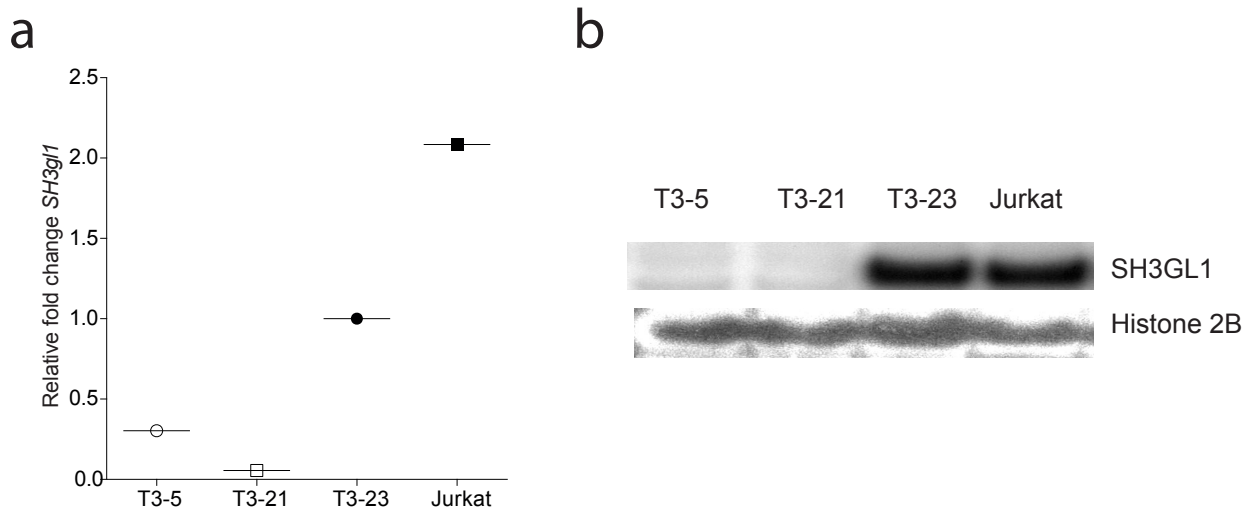

**Supplementary figure 6. Knock-down efficacy of EA2 in EA2 CRISPR knock-out cells.**

a) *SH3gl1* gene expression in EA2 CRISPR Jurkat knock-out cells relative to normal Jurkat cells. b) Western blot analysis of the expression of the Endophilin A2 protein in EA2 CRISPR Jurkat knock-out cells. Histone 2B was used as loading control.

a

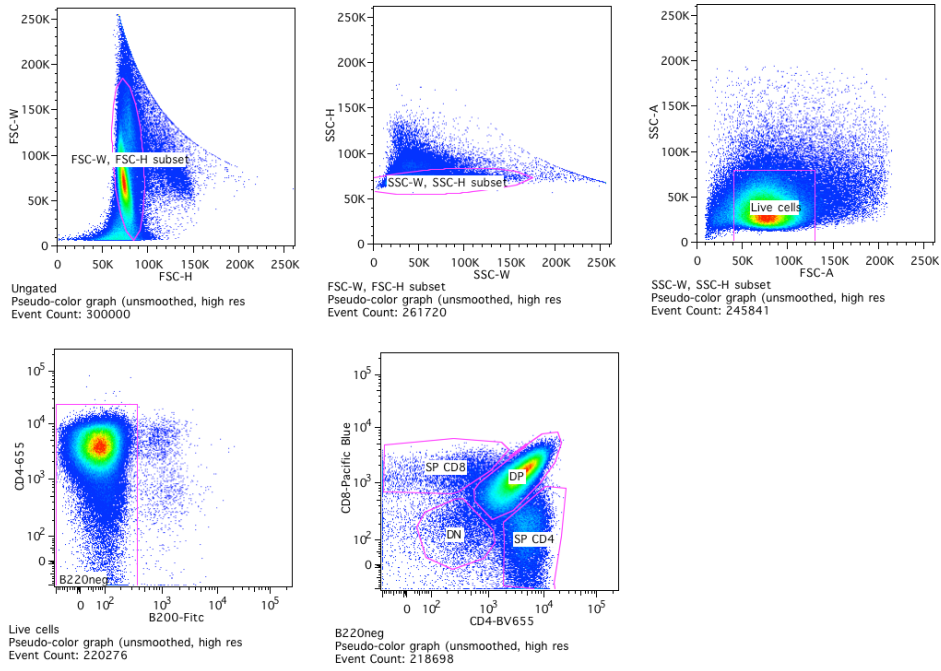

b

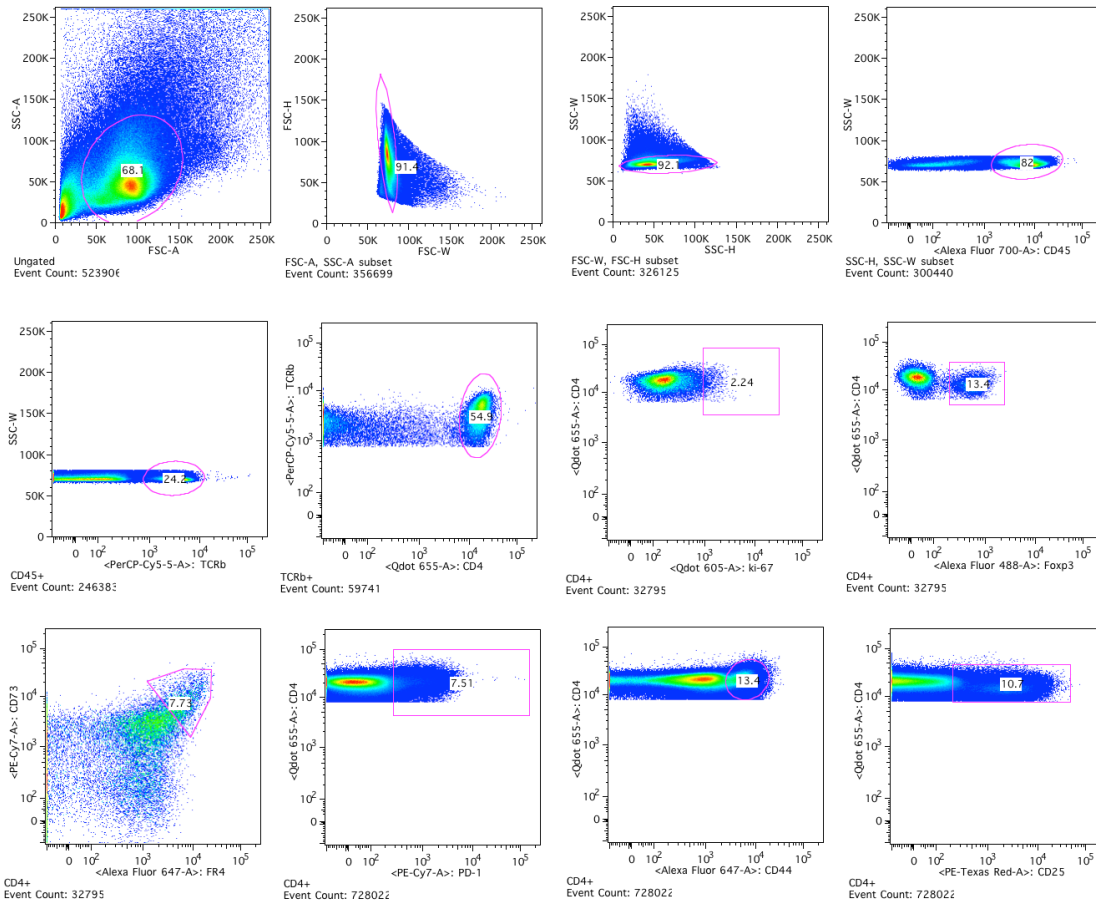



**C**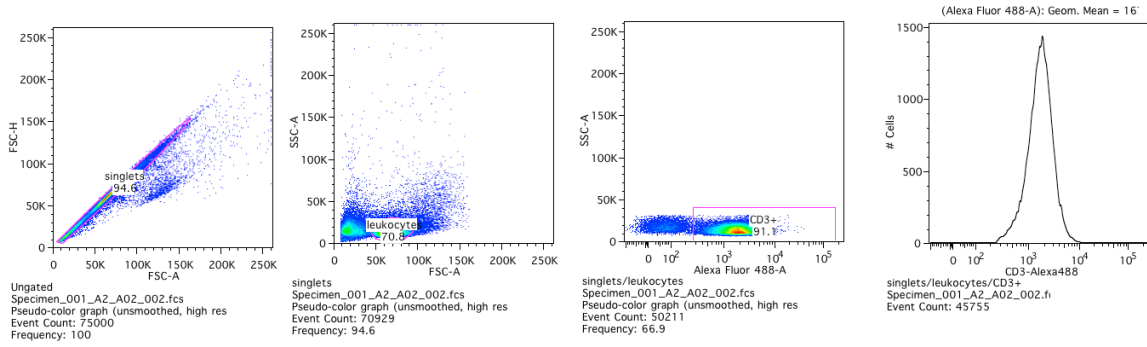**d**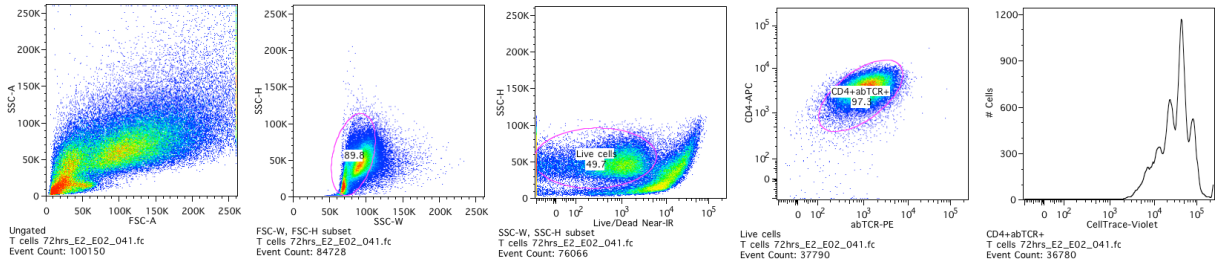**e**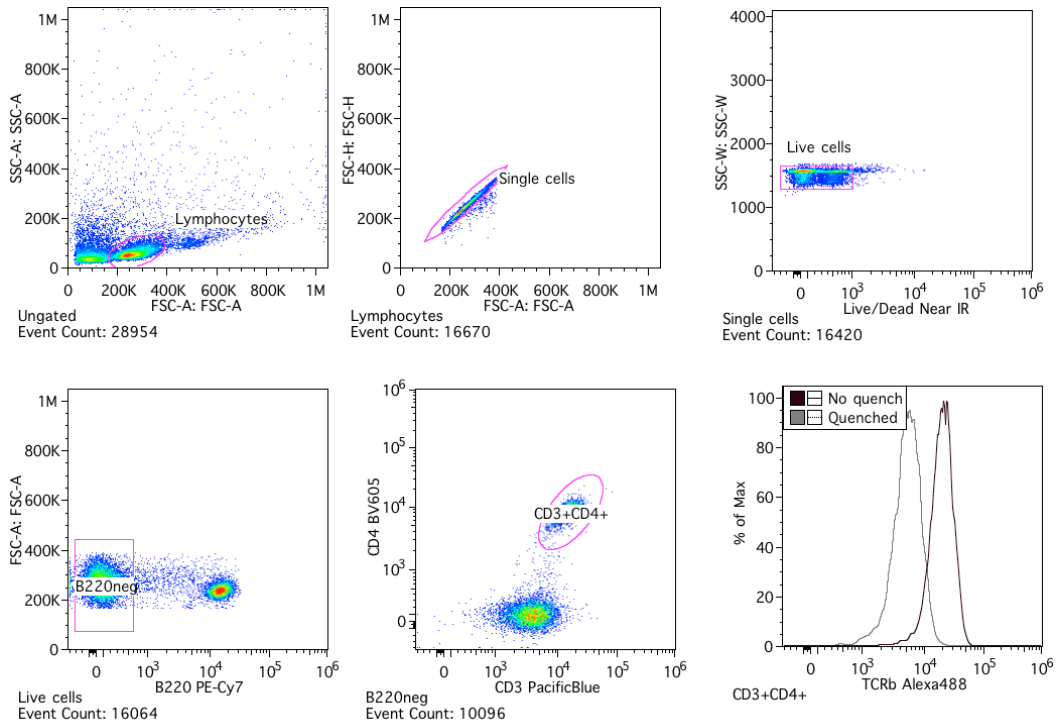

f

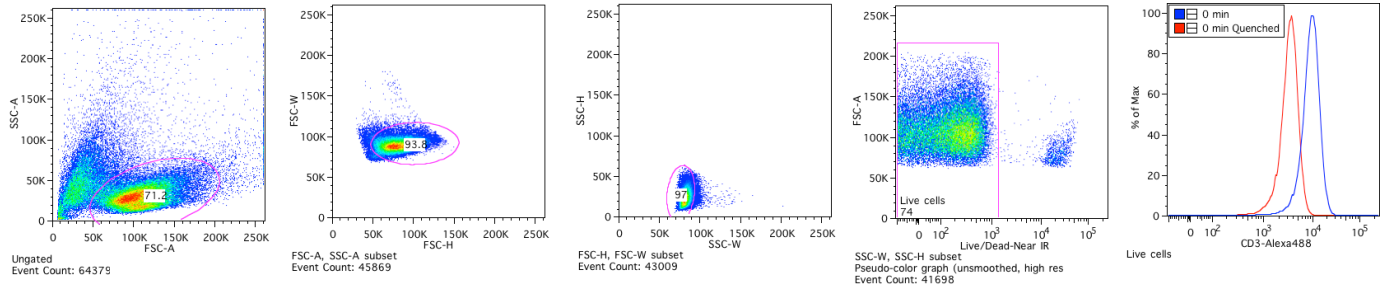

g

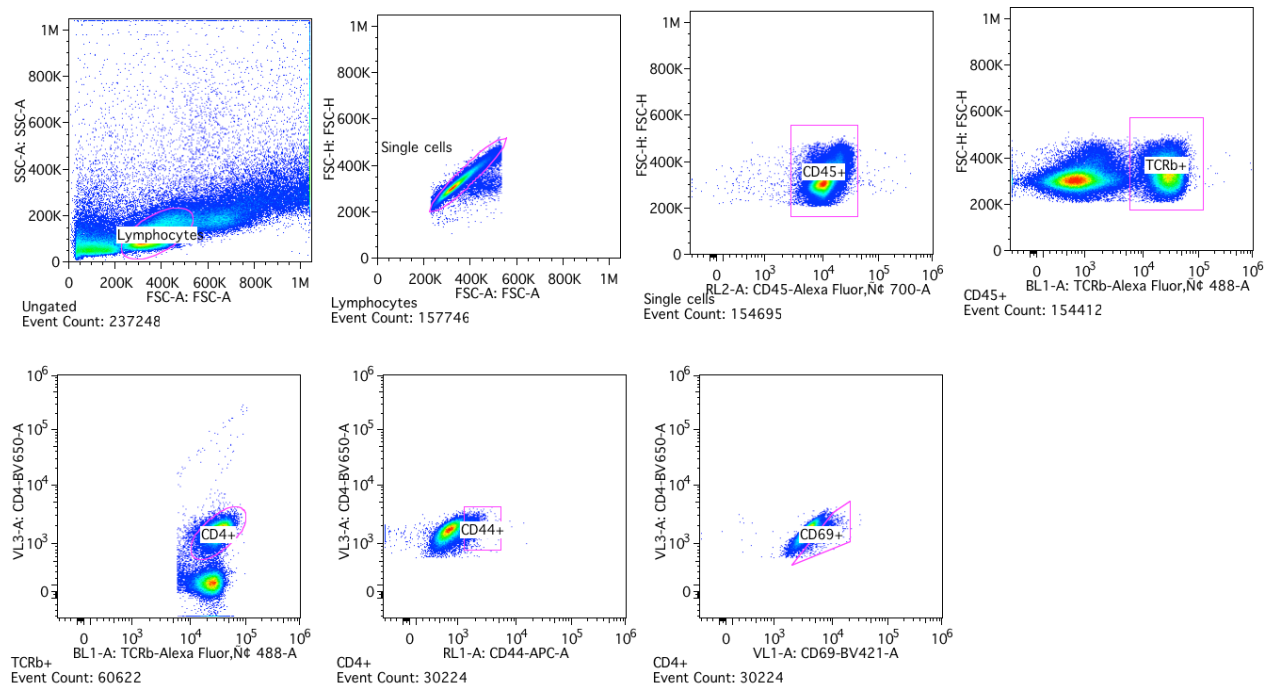

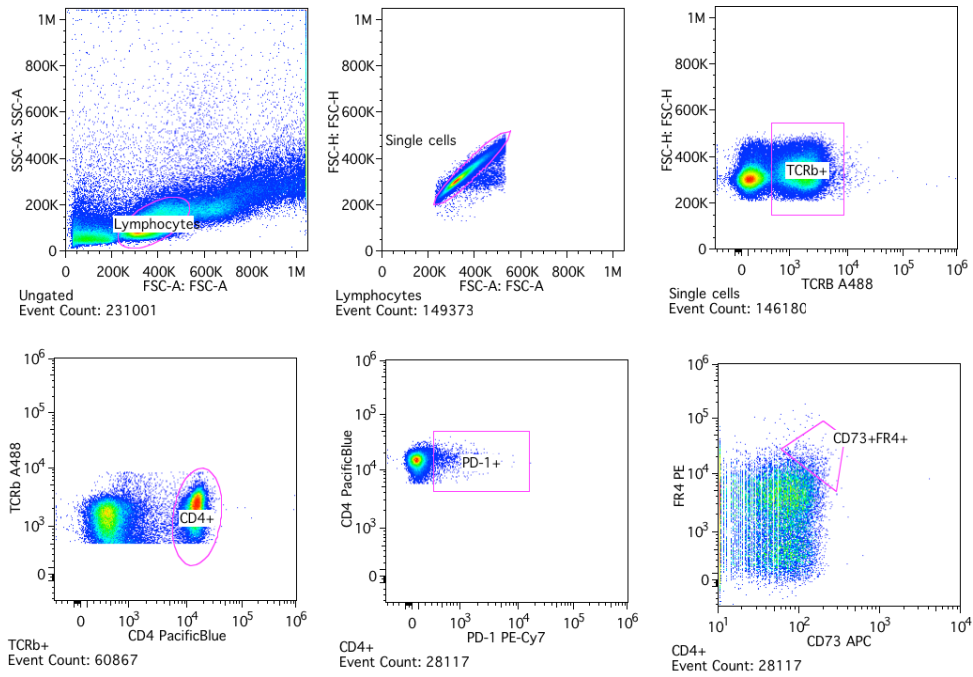

h

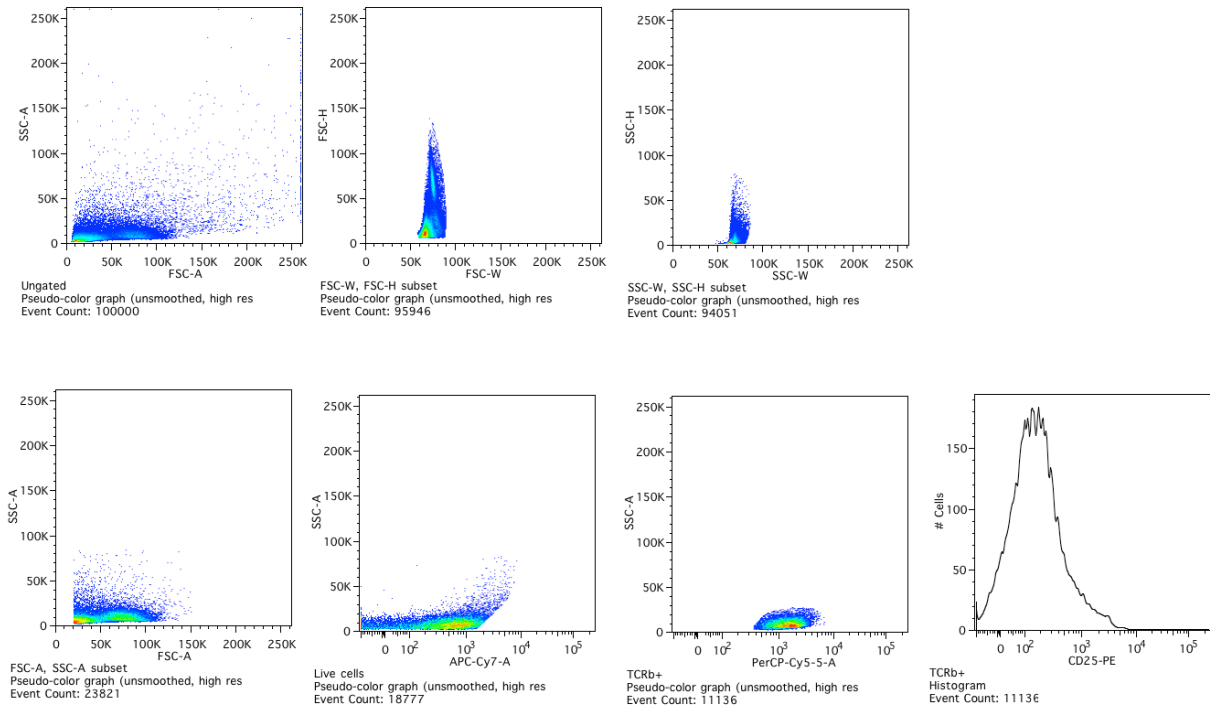

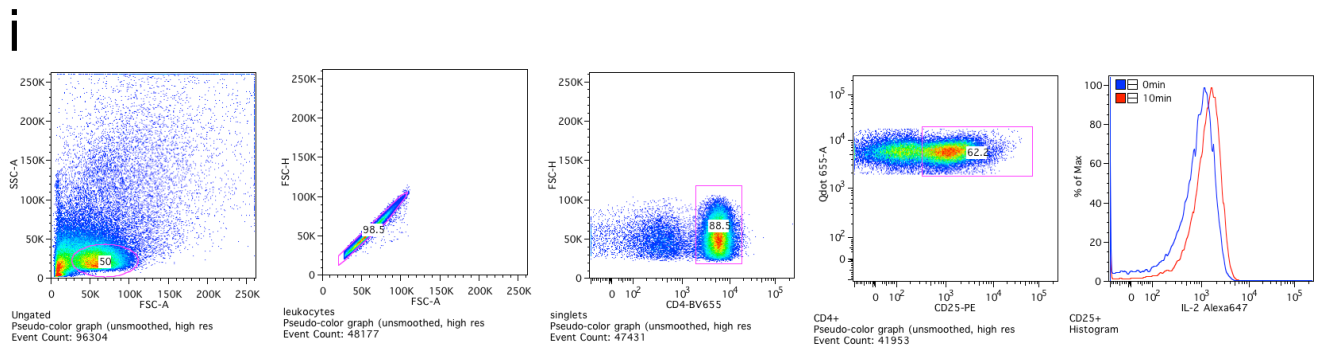

### Supplementary figure 7. Representative FlowJo plots displaying stepwise gating strategy

#### for flow cytometry analysis with subsequent number of cells analyzed within each gate. a)

Gating strategy for thymocyte populations shown in Figure 3e. b) Gating strategy for identification of T cell activation and anergy shown in Figure 3f c) Gating strategy for TCR internalization in rat T cells shown in Figure 4b d) Gating strategy for identification of proliferation of T cells shown in Figure 4f e) Gating strategy for TCR internalization in T cells from lymph nodes shown in Figure 4i f) Gating strategy for TCR internalization in CRISPR Jurkat T cells shown in Figure 5a g) Gating strategy for identification of T cell activation and anergy shown in Supplementary figure 2 h) Gating strategy for identification of expression of CD25 on T cells shown in Supplementary figure 5a i) Gating strategy for identification of intracellular levels of IL-2 shown in Supplementary figure 5b

### Supplementary Table 1. Sequences of PCR primers used for H3K4me3 and H4ac ChIP-

#### qPCR

| Gene          | Primer set | Forward primer         | Reverse primer          |
|---------------|------------|------------------------|-------------------------|
| <i>Gapdh</i>  | 1          | TACTTCGGCCACCCTATCCA   | CATGCCGGTCTGGCTAAATT    |
| <i>Sh3gl1</i> | 1          | CGAGAAACTGAACTCCGGATCT | GGAACGAATGGTTCTCCAGTTAA |
| <i>Sh3gl1</i> | 2          | CGGAAACCTTAGTTCGAGCG   | AACTGCTTCTTCAGCCCCG     |
| <i>Sh3gl1</i> | 3          | CAGGCCACAGAAAATGTTTGTC | GCCCTGTGCAGACTTGGTAAG   |
