# Supplementary material for: Endophilin A2 deficiency protects rodents from autoimmune arthritis by modulating T cell activation
Source: PubMed Central journal article supplement (PMC7840939; doi:10.1038/s41467-020-20586-2), 2021-01-27
Supplement: 41467_2020_20586_MOESM2_ESM.pdf [file 41467_2020_20586_MOESM2_ESM.pdf]

## Reporting Summary

Nature Research wishes to improve the reproducibility of the work that we publish. This form provides structure for consistency and transparency in reporting. For further information on Nature Research policies, see our [Editorial Policies](#) and the [Editorial Policy Checklist](#).

### Statistics

For all statistical analyses, confirm that the following items are present in the figure legend, table legend, main text, or Methods section.

n/a Confirmed

- The exact sample size ( $n$ ) for each experimental group/condition, given as a discrete number and unit of measurement
- A statement on whether measurements were taken from distinct samples or whether the same sample was measured repeatedly
- The statistical test(s) used AND whether they are one- or two-sided  
*Only common tests should be described solely by name; describe more complex techniques in the Methods section.*
- A description of all covariates tested
- A description of any assumptions or corrections, such as tests of normality and adjustment for multiple comparisons
- A full description of the statistical parameters including central tendency (e.g. means) or other basic estimates (e.g. regression coefficient) AND variation (e.g. standard deviation) or associated estimates of uncertainty (e.g. confidence intervals)
- For null hypothesis testing, the test statistic (e.g.  $F$ ,  $t$ ,  $r$ ) with confidence intervals, effect sizes, degrees of freedom and  $P$  value noted  
*Give  $P$  values as exact values whenever suitable.*
- For Bayesian analysis, information on the choice of priors and Markov chain Monte Carlo settings
- For hierarchical and complex designs, identification of the appropriate level for tests and full reporting of outcomes
- Estimates of effect sizes (e.g. Cohen's  $d$ , Pearson's  $r$ ), indicating how they were calculated

*Our web collection on [statistics for biologists](#) contains articles on many of the points above.*

### Software and code

Policy information about [availability of computer code](#)

**Data collection**

**Data analysis**

For manuscripts utilizing custom algorithms or software that are central to the research but not yet described in published literature, software must be made available to editors and reviewers. We strongly encourage code deposition in a community repository (e.g. GitHub). See the Nature Research [guidelines for submitting code & software](#) for further information.

### Data

Policy information about [availability of data](#)

All manuscripts must include a [data availability statement](#). This statement should provide the following information, where applicable:

- Accession codes, unique identifiers, or web links for publicly available datasets
- A list of figures that have associated raw data
- A description of any restrictions on data availability

## Field-specific reporting

Please select the one below that is the best fit for your research. If you are not sure, read the appropriate sections before making your selection.

- Life sciences       Behavioural & social sciences       Ecological, evolutionary & environmental sciences

For a reference copy of the document with all sections, see [nature.com/documents/nr-reporting-summary-flat.pdf](https://www.nature.com/documents/nr-reporting-summary-flat.pdf)

## Life sciences study design

All studies must disclose on these points even when the disclosure is negative.

|                 |                                                                                                                                                              |
|-----------------|--------------------------------------------------------------------------------------------------------------------------------------------------------------|
| Sample size     | Noted in manuscript                                                                                                                                          |
| Data exclusions | A few samples in the human cohort were excluded after being tested as outliers in GraphPad Prism for gene expression, marked in red in the data source file. |
| Replication     | Noted in manuscript                                                                                                                                          |
| Randomization   | Animals of different genotypes were mixed in cages during all animal studies.                                                                                |
| Blinding        | All animal models studies were scored in a blinded manner, where the person scoring did not know the genotype of the animals.                                |

## Reporting for specific materials, systems and methods

We require information from authors about some types of materials, experimental systems and methods used in many studies. Here, indicate whether each material, system or method listed is relevant to your study. If you are not sure if a list item applies to your research, read the appropriate section before selecting a response.

### Materials & experimental systems

| n/a                                 | Involvement                         | Involved in the study         |
|-------------------------------------|-------------------------------------|-------------------------------|
| <input type="checkbox"/>            | <input checked="" type="checkbox"/> | Antibodies                    |
| <input type="checkbox"/>            | <input checked="" type="checkbox"/> | Eukaryotic cell lines         |
| <input checked="" type="checkbox"/> | <input type="checkbox"/>            | Palaeontology and archaeology |
| <input type="checkbox"/>            | <input checked="" type="checkbox"/> | Animals and other organisms   |
| <input type="checkbox"/>            | <input checked="" type="checkbox"/> | Human research participants   |
| <input checked="" type="checkbox"/> | <input type="checkbox"/>            | Clinical data                 |
| <input checked="" type="checkbox"/> | <input type="checkbox"/>            | Dual use research of concern  |

### Methods

| n/a                                 | Involvement                         | Involved in the study  |
|-------------------------------------|-------------------------------------|------------------------|
| <input checked="" type="checkbox"/> | <input type="checkbox"/>            | ChIP-seq               |
| <input type="checkbox"/>            | <input checked="" type="checkbox"/> | Flow cytometry         |
| <input checked="" type="checkbox"/> | <input type="checkbox"/>            | MRI-based neuroimaging |

## Antibodies

Antibodies used

mouse anti-rat Endophilin A2 (clone S51-1, Origene Technologies, Inc),  
 rabbit anti-histone 2B (Cat. No C49810, LifeSpan Biosciences, Inc).  
 goat anti-mouse IgG(Cat no. 115-035-062, Jackson ImmunoResearch laboratories Inc.) peroxidase-conjugated donkey anti-rabbit IgG (Cat no.771-036-152, Jackson ImmunoResearch laboratories Inc.)

mouse anti-rat CD11b/c (Clone OX42, Biolegend)  
 mouse anti-rat CD45Ra (Clone OX33, Biolegend)  
 anti-human CD3 (Clone UTCH1) conjugated with Alexa488 (BD Biosciences)  
 anti-human CD3 (Clone Hit3a, BD Biosciences)  
 anti-human CD28(Clone CD28.2, BD Biosciences)

hamster anti-mouse TCRb (Clone H57-597, Biolegend) conjugated with Alexa488  
 anti-mouse CD3e (Clone 145-2C11, BD Biosciences)  
 anti-mouse CD28(Clone 37.51, BD Biosciences)

rat anti-mouse CD45R-PE-Cy7 (Clone RA3-6B2, BD Biosciences)  
 rat anti-mouse CD4-BV605 (Clone RM4.5, BD Biosciences)  
 rat anti-mouse CD3-PacificBlue (Clone 17A2, Biolegend)  
 anti-Alexa488 (MolecularProbes, Invitrogen)  
 rabbit anti- mouse phosphorylated Zap70 (Clone 65E4, Cell Signaling Technology)  
 rabbit anti- phosphorylated-p44/42 MAPK (Erk1/2) (Thr202/Tyr204) (Cell Signaling Technology)  
 rabbit anti-histone 2B (Cat no. ab1790 Abcam)

peroxidase-conjugated donkey anti-rabbit IgG (Cat no.771-036-152, Jackson ImmunoResearch laboratories Inc.)  
 rabbit anti-human EA2 (Sigma HPA021485)

Produced in house

anti- mouse IL-2 (clone JES6-IA12),  
 anti- mouse IL-17(clone TC11-18H10)  
 anti- mouse IFNg(AN18)  
 anti- mouse IL-2 (clone 5H4)  
 anti- mouse IL-17 (clone TC11-8H4)  
 anti- mouse IFN $\gamma$  (R46A2)  
 anti-rat  $\alpha\beta$ TCR(Clone R73)  
 anti-rat CD28(Clone JJI319)

mouse anti-rat Endophilin A2 (clone S51-1, Origene Technologies, Inc),  
 rabbit anti-histone 2B (Cat. No C49810, LifeSpan Biosciences, Inc).

goat anti-mouse IgG(Cat no. 115-035-062, Jackson ImmunoResearch laboratories Inc.) peroxidase-conjugated donkey anti-rabbit IgG  
 (Cat no.771-036-152, Jackson ImmunoResearch laboratories Inc.)

mouse anti-rat CD11b/c (Clone OX42, Biolegend)  
 mouse anti-rat CD45Ra (Clone OX33, Biolegend)  
 anti-human CD3 (Clone UTCH1) conjugated with Alexa488 (BD Biosciences)  
 anti-human CD3 (Clone Hit3a, BD Biosciences)  
 anti-human CD28(Clone CD28.2, BD Biosciences)

hamster anti-mouse TCRb (Clone H57-597, Biolegend) conjugated with Alexa488  
 anti-mouse CD3e (Clone 145-2C11, BD Biosciences)  
 anti-mouse CD28(Clone 37.51, BD Biosciences)

rat anti-mouse CD45R-PE-Cy7 (Clone RA3-6B2, BD Biosciences)  
 rat anti-mouse CD4-BV605 (Clone RM4.5, BD Biosciences)  
 rat anti-mouse CD3-PacificBlue (Clone 17A2, Biolegend)  
 anti-Alexa488 (MolecularProbes, Invitrogen)  
 rabbit anti- mouse phosphorylated Zap70 (Clone 65E4, Cell Signaling Technology)  
 rabbit anti- phosphorylated-p44/42 MAPK (Erk1/2) (Thr202/Tyr204) (Cell Signaling Technology)  
 rabbit anti-histone 2B (Cat no. ab1790 Abcam)  
 peroxidase-conjugated donkey anti-rabbit IgG (Cat no.771-036-152, Jackson ImmunoResearch laboratories Inc.)  
 rabbit anti-human EA2 (Sigma HPA021485)

Produced in house

anti- mouse IL-2 (clone JES6-IA12),  
 anti- mouse IL-17(clone TC11-18H10)  
 anti- mouse IFNg(AN18)  
 anti- mouse IL-2 (clone 5H4)  
 anti- mouse IL-17 (clone TC11-8H4)  
 anti- mouse IFN $\gamma$  (R46A2)  
 anti-rat  $\alpha\beta$ TCR(Clone R73)  
 anti-rat CD28(Clone JJI319)

Validation

All antibodies used in the studies are commercially available and validated

## Eukaryotic cell lines

Policy information about [cell lines](#)

Cell line source(s)

The CRISPR cell lines were ordered and manufactured by Genscript.

Authentication

The validity of the CRISPR cell lines were checked by qPCR and western blot

Mycoplasma contamination

The cell lines were checked for mycoplasma contamination by the manufactureres but not by us.

Commonly misidentified lines  
 (See [ICLAC](#) register)

NA

## Animals and other organisms

Policy information about [studies involving animals](#); [ARRIVE guidelines](#) recommended for reporting animal research

Laboratory animals

All strains were described in the methods section

|                         |                                                                                                                      |
|-------------------------|----------------------------------------------------------------------------------------------------------------------|
| Wild animals            | <input type="text" value="The study did not involve wild animals"/>                                                  |
| Field-collected samples | <input type="text" value="The study did not involve field samples."/>                                                |
| Ethics oversight        | <input type="text" value="The animal experiments were approved by a local ethics committee assigned by the state."/> |

Note that full information on the approval of the study protocol must also be provided in the manuscript.

## Human research participants

Policy information about [studies involving human research participants](#)

|                            |                                                          |
|----------------------------|----------------------------------------------------------|
| Population characteristics | <input type="text" value="Not known"/>                   |
| Recruitment                | <input type="text" value="Not known"/>                   |
| Ethics oversight           | <input type="text" value="The local ethics committee."/> |

Note that full information on the approval of the study protocol must also be provided in the manuscript.

## Flow Cytometry

### Plots

Confirm that:

- The axis labels state the marker and fluorochrome used (e.g. CD4-FITC).
- The axis scales are clearly visible. Include numbers along axes only for bottom left plot of group (a 'group' is an analysis of identical markers).
- All plots are contour plots with outliers or pseudocolor plots.
- A numerical value for number of cells or percentage (with statistics) is provided.

### Methodology

|                           |                                                                          |
|---------------------------|--------------------------------------------------------------------------|
| Sample preparation        | <input type="text" value="Stated in the methods section"/>               |
| Instrument                | <input type="text" value="LSR II, BD biosciences"/>                      |
| Software                  | <input type="text" value="FlowJo"/>                                      |
| Cell population abundance | <input type="text" value="Shown in the gates of the facs plots."/>       |
| Gating strategy           | <input type="text" value="Shown in the supporting information 2 file."/> |

- Tick this box to confirm that a figure exemplifying the gating strategy is provided in the Supplementary Information.
